# Supplementary material for: Stable isotopes reveal intensive pig husbandry practices in the middle Yellow River region by the Yangshao period (7000–5000 BP)
Source: PLoS One. 2021 Oct 5;16(10):e0257524. doi: 10.1371/journal.pone.0257524 (PMC8491901; doi:10.1371/journal.pone.0257524)
Supplement: S3 Table — Ordered Logistic Regression in 5.2 and 5.3. (XLSX) [file pone.0257524.s003.xlsx]

## Sheet: 工作表1
Ordered Logistic Regression in 5.2
formula = Burial Class ~ Human δ13C + δ15N, Hess = TRUE						formula = Burial Class ~ Human δ13C, Hess = TRUE						formula = Burial Class ~ Human δ15N, Hess = TRUE
	Value	Std. Error	t value	p value			Value	Std. Error	t value	p value			Value	Std. Error	t value	p value
Coefficients:						Coefficients:						Coefficients:
δ13C	-0.5444	0.420227	-1.29549	0.195151		δ13C	0.0343352	0.363096	0.0945625	0.924662		δ15N	-0.928811	0.393632	-2.35959	0.018295
δ15N	-1.28628	0.508501	-2.52955	0.0114209		Intercepts:						Intercepts:
Intercepts:						1|2	-2.52459	3.51816	-0.717588	0.473011		1|2	-11.3511	4.04362	-2.80717	0.00499794
1|2	-9.64373	4.37447	-2.20455	0.0274858		2|3	-1.33735	3.47103	-0.38529	0.700022		2|3	-9.79163	3.79192	-2.58223	0.00981637
2|3	-8.01714	4.1392	-1.93688	0.0527598		3|4	-0.192587	3.46854	-0.055524	0.955721		3|4	-8.45914	3.68408	-2.29613	0.0216682
3|4	-6.60275	4.04817	-1.63105	0.102881
						Residual Deviance: 74.21219						Residual Deviance: 67.94157
Residual Deviance: 66.22255						AIC: 82.21219						AIC: 75.94157
AIC: 76.22255
Ordered Logistic Regression in 5.3
formula = Chronological Sequence ~ Pig δ13C + δ15N, Hess = TRUE						formula = Chronological Sequence ~ Pig δ13C, Hess = TRUE						formula = Chronological Sequence ~ Pig δ15N, Hess = TRUE
	Value	Std. Error	t value	p value			Value	Std. Error	t value	p value			Value	Std. Error	t value	p value
Coefficients:						Coefficients:						Coefficients:
δ13C	0.807076	0.172455	4.67993	2.86969e-06		δ13C	0.880726	0.162742	5.41181	6.23926e-08		δ15N	1.19417	0.260896	4.57719	4.71252e-06
δ15N	0.617357	0.301744	2.04596	0.0407599		Intercepts:						Intercepts:
Intercepts:						1|2	-10.4063	1.64161	-6.3391	2.31118e-10		1|2	6.21235	1.75113	3.54762	0.000388727
1|2	-5.44594	2.85145	-1.90988	0.0561483		2|3	-10.0394	1.59428	-6.29714	3.03185e-10		2|3	6.4515	1.76968	3.64557	0.000266801
2|3	-5.00982	2.84658	-1.75994	0.0784175		3|4	-8.88744	1.48097	-6.00109	1.95994e-09		3|4	7.23402	1.80507	4.00762	6.13347e-05
3|4	-3.78844	2.81037	-1.34802	0.177652		4|5	-3.69743	1.26547	-2.92177	0.00348044		4|5	11.8461	2.04931	5.78057	7.445e-09
4|5	1.41079	2.77805	0.507835	0.611569
						Residual Deviance: 142.4434						Residual Deviance: 172.5696
Residual Deviance: 138.0945						AIC: 152.4434						AIC: 182.5696
AIC: 150.0945
